# Supplementary material for: Factors associated with treatment satisfaction in patients with rheumatoid arthritis: data from the biological register RABBIT
Source: PubMed Central journal article supplement — RMD Open. 2020 Oct 13;6(3):e001290. doi: 10.1136/rmdopen-2020-001290 (PMC7722277; doi:10.1136/rmdopen-2020-001290), 2020-10-13
Supplement: rmdopen-2020-001290supp001.pdf [file rmdopen-2020-001290supp001.pdf]

Supplementary Table 1 Missing values for 10,646 patients

| Parameter                                                          | T0   |      | T1   |      | T2   |      | T3   |      |
|--------------------------------------------------------------------|------|------|------|------|------|------|------|------|
|                                                                    | n    | %    | n    | %    | n    | %    | n    | %    |
| Satisfaction with efficacy of therapy                              | 860  | 8.1  | n.a. | n.a. | n.a. | n.a. | 2153 | 20.2 |
| Satisfaction with tolerability of therapy                          | 1037 | 9.7  | n.a. | n.a. | n.a. | n.a. | 2273 | 21.4 |
| DAS28-ESR                                                          | 910  | 8.5  | 2126 | 20.0 | 2272 | 21.3 | 2747 | 25.8 |
| ESR                                                                | 785  | 7.4  | 1899 | 17.8 | 2050 | 19.3 | 2511 | 23.6 |
| Patient global health assessment                                   | 115  | 1.1  | 922  | 8.7  | 1052 | 9.9  | 1570 | 14.8 |
| Swollen joint count                                                | 11   | 0.1  | 690  | 6.5  | 838  | 7.9  | 1333 | 12.5 |
| Tender joint count                                                 | 8    | 0.1  | 693  | 6.5  | 840  | 7.9  | 1329 | 12.5 |
| Pain level                                                         | 86   | 0.8  | 920  | 8.6  | 1035 | 9.7  | 1558 | 14.6 |
| Fatigue level                                                      | 97   | 0.9  | 923  | 8.7  | 1033 | 9.7  | 1560 | 14.7 |
| Level of sleeping disorders                                        | 126  | 1.2  | 928  | 8.7  | 1041 | 9.8  | 1585 | 14.9 |
| % of full physical function                                        | 178  | 1.7  | 985  | 9.3  | 1104 | 10.4 | 1623 | 15.3 |
| Disease duration                                                   | 0    | 0    | n.a. | n.a. | n.a. | n.a. | n.a. | n.a. |
| Glucocorticoid dose (T0, T3: last 6 months, T1, T2: last 3 months) | 22   | 0.2  | 698  | 6.6  | 854  | 9.0  | 1333 | 12.5 |
| Rheumatoid factor                                                  | 217  | 2.0  | n.a. | n.a. | n.a. | n.a. | n.a. | n.a. |
| ACPA                                                               | 1748 | 16.4 | n.a. | n.a. | n.a. | n.a. | n.a. | n.a. |
| Joint erosions                                                     | 468  | 4.4  | n.a. | n.a. | n.a. | n.a. | n.a. | n.a. |
| Smoking                                                            | 526  | 4.9  | n.a. | n.a. | n.a. | n.a. | n.a. | n.a. |

Shown are missing values for four time points: at baseline (T0), three (T1), six (T2), and twelve months (T3) after treatment start (n.a. = not applicable).

Supplementary Table 2 Results from logistic regression model considering reduction of glucocorticoid dose within 12 months

|                                            | effectiveness |                  |                  | tolerability |                  |                  |
|--------------------------------------------|---------------|------------------|------------------|--------------|------------------|------------------|
|                                            | OR            | 95% CI           | p-value          | OR           | 95% CI           | p-value          |
| <i>Baseline parameter</i>                  |               |                  |                  |              |                  |                  |
| Satisfaction at baseline                   | <b>3.11</b>   | <b>2.70;3.58</b> | <b>&lt;.0001</b> | <b>2.44</b>  | <b>2.07;2.88</b> | <b>&lt;.0001</b> |
| Seropositivity (RF and/or ACPA)            | <b>1.31</b>   | <b>1.13;1.51</b> | <b>0.0003</b>    | <b>1.19</b>  | <b>1.01;1.39</b> | <b>0.0321</b>    |
| ≥1 bDMARD prior to enrolment               | <b>0.79</b>   | <b>0.67;0.93</b> | <b>0.0047</b>    | 0.98         | 0.79;1.22        | 0.8552           |
| Depression                                 | <b>0.65</b>   | <b>0.52;0.81</b> | <b>0.0001</b>    | <b>0.55</b>  | <b>0.43;0.69</b> | <b>&lt;.0001</b> |
| Fibromyalgia                               | <b>0.72</b>   | <b>0.52;0.98</b> | <b>0.0401</b>    | 0.81         | 0.58;1.13        | 0.2144           |
| Obesity (BMI ≥30, reference <30)           | <b>0.86</b>   | <b>0.74;0.99</b> | <b>0.0374</b>    | 0.93         | 0.78;1.11        | 0.4151           |
| Heart failure                              | 1.19          | 0.75;1.89        | 0.4611           | 0.90         | 0.57;1.42        | 0.6645           |
| Diabetes                                   | 0.93          | 0.74;1.17        | 0.5237           | 0.86         | 0.70;1.07        | 0.1809           |
| Chronic kidney disease                     | 0.97          | 0.72;1.32        | 0.8596           | 1.05         | 0.71;1.54        | 0.8086           |
| Malignant neoplasm                         | 1.01          | 0.71;1.44        | 0.9520           | 0.92         | 0.63;1.34        | 0.6645           |
| Degenerative spine disease                 | 0.92          | 0.76;1.11        | 0.3722           | 0.86         | 0.71;1.54        | 0.1316           |
| Osteoarthritis                             | 0.91          | 0.76;1.08        | 0.2768           | 0.94         | 0.78;1.13        | 0.5171           |
| Osteoporosis                               | 0.91          | 0.75;1.09        | 0.2961           | 0.95         | 0.77;1.19        | 0.6762           |
| Age at onset (10 years)                    | 1.04          | 0.98;1.09        | 0.2102           | 1.00         | 0.94;1.06        | 0.9432           |
| Female sex                                 | 1.03          | 0.88;1.22        | 0.6819           | 1.08         | 0.89;1.30        | 0.4396           |
| Former smoking                             | 0.91          | 0.76;1.08        | 0.2604           | 0.96         | 0.79;1.16        | 0.6759           |
| Current smoking                            | 0.94          | 0.79;1.13        | 0.5299           | 0.98         | 0.82;1.18        | 0.8395           |
| No information on smoking                  | 1.11          | 0.76;1.60        | 0.5886           | 0.92         | 0.65;1.30        | 0.6499           |
| <i>Parameter after 12 months</i>           |               |                  |                  |              |                  |                  |
| DAS28-ESR reduction by 1 point             | <b>1.39</b>   | <b>1.32;1.47</b> | <b>&lt;.0001</b> | <b>1.32</b>  | <b>1.25;1.40</b> | <b>&lt;.0001</b> |
| Pain reduction by 1 point                  | <b>1.27</b>   | <b>1.22;1.31</b> | <b>&lt;.0001</b> | <b>1.13</b>  | <b>1.09;1.17</b> | <b>&lt;.0001</b> |
| Increase in physical capacity by 10 points | <b>1.23</b>   | <b>1.17;1.29</b> | <b>&lt;.0001</b> | <b>1.11</b>  | <b>.05;1.18</b>  | <b>0.0003</b>    |
| Fatigue reduction by 1 point               | 1.01          | 0.98;1.05        | 0.3837           | <b>1.04</b>  | <b>1.00;1.07</b> | <b>0.0328</b>    |
| Sleeping disorder reduction by 1 point     | 1.01          | 0.98;1.05        | 0.3373           | 1.03         | 1.00;1.06        | 0.0639           |
| Reduction in glucocorticoids by 5mg/d      | <b>1.19</b>   | <b>1.11;1.27</b> | <b>&lt;.0001</b> | <b>1.11</b>  | <b>1.03;1.21</b> | <b>0.0095</b>    |
| ≥1 change of therapy after enrolment       | <b>0.61</b>   | <b>0.53;0.70</b> | <b>&lt;.0001</b> | <b>0.63</b>  | <b>0.54;0.73</b> | <b>&lt;.0001</b> |
| b/tsDMARD therapy                          | 1.08          | 0.92;1.26        | 0.3541           | 1.13         | 0.96;1.34        | 0.1397           |

Supplementary Table 3 Results from logistic regression model considering components of DAS28-ESR

|                                            | effectiveness |                  |                  | tolerability |                  |                  |
|--------------------------------------------|---------------|------------------|------------------|--------------|------------------|------------------|
|                                            | OR            | 95% CI           | p-value          | OR           | 95% CI           | p-value          |
| <i>Baseline parameter</i>                  |               |                  |                  |              |                  |                  |
| Satisfaction at baseline                   | <b>3.04</b>   | <b>2.64;3.51</b> | <b>&lt;.0001</b> | <b>2.43</b>  | <b>2.05;2.88</b> | <b>&lt;.0001</b> |
| Seropositivity (RF and/or ACPA)            | <b>1.37</b>   | <b>1.19;1.59</b> | <b>&lt;.0001</b> | <b>1.23</b>  | <b>1.05;1.44</b> | <b>0.0093</b>    |
| ≥1 bDMARD prior to enrolment               | <b>0.76</b>   | <b>0.64;0.90</b> | <b>0.0014</b>    | 0.95         | 0.77;1.18        | 0.6474           |
| Depression                                 | <b>0.63</b>   | <b>0.51;0.79</b> | <b>&lt;.0001</b> | <b>0.54</b>  | <b>0.43;0.68</b> | <b>&lt;.0001</b> |
| Fibromyalgia                               | <b>0.70</b>   | <b>0.51;0.97</b> | <b>0.0302</b>    | 0.80         | 0.57;1.12        | 0.1870           |
| Obesity (BMI ≥30, reference <30)           | <b>0.85</b>   | <b>0.74;0.99</b> | <b>0.0306</b>    | 0.93         | 0.78;1.10        | 0.3994           |
| Heart failure                              | 1.19          | 0.75;1.91        | 0.4581           | 0.91         | 0.57;1.44        | 0.6779           |
| Diabetes                                   | 0.92          | 0.74;1.16        | 0.4789           | 0.86         | 0.69;1.07        | 0.1825           |
| Chronic kidney disease                     | 0.98          | 0.72;1.33        | 0.8879           | 1.06         | 0.72;1.56        | 0.7756           |
| Malignant neoplasm                         | 1.00          | 0.71;1.43        | 0.9781           | 0.92         | 0.63;1.34        | 0.6650           |
| Degenerative spine disease                 | 0.91          | 0.75;1.11        | 0.3446           | 0.86         | 0.70;1.05        | 0.1271           |
| Osteoarthritis                             | 0.90          | 0.75;1.07        | 0.2233           | 0.93         | 0.77;1.12        | 0.4557           |
| Osteoporosis                               | 0.92          | 0.77;1.11        | 0.4068           | 0.98         | 0.78;1.21        | 0.8197           |
| Age at onset (10 years)                    | 1.04          | 0.98;1.10        | 0.1647           | 1.00         | 0.95;1.07        | 0.8786           |
| Female sex                                 | 1.09          | 0.93;1.29        | 0.2923           | 1.12         | 0.93;1.36        | 0.2229           |
| Former smoking                             | 0.92          | 0.77;1.09        | 0.3014           | 0.96         | 0.80;1.17        | 0.7102           |
| Current smoking                            | 0.95          | 0.79;1.14        | 0.5899           | 0.98         | 0.81;1.18        | 0.8317           |
| No information on smoking                  | 1.11          | 0.77;1.59        | 0.5838           | 0.91         | 0.65;1.29        | 0.5985           |
| <i>Parameter after 12 months</i>           |               |                  |                  |              |                  |                  |
| Tender joints count reduction by 1 joint   | <b>1.03</b>   | <b>1.01;1.04</b> | <b>&lt;.0001</b> | <b>1.02</b>  | <b>1.00;1.03</b> | <b>0.0086</b>    |
| Swollen joints count reduction by 1 joint  | <b>1.03</b>   | <b>1.02;1.05</b> | <b>0.0003</b>    | <b>1.03</b>  | <b>1.01;1.05</b> | <b>0.0017</b>    |
| Global health improvement by 1 point       | <b>1.12</b>   | <b>1.07;1.17</b> | <b>&lt;.0001</b> | <b>1.11</b>  | <b>1.06;1.17</b> | <b>&lt;.0001</b> |
| ESR reduction by 10 points                 | <b>1.05</b>   | <b>1.02;1.08</b> | <b>0.0014</b>    | <b>1.06</b>  | <b>1.02;1.10</b> | <b>0.0011</b>    |
| Pain reduction by 1 point                  | <b>1.23</b>   | <b>1.18;1.29</b> | <b>&lt;.0001</b> | <b>1.10</b>  | <b>1.05;1.15</b> | <b>0.0001</b>    |
| Increase in physical capacity by 10 points | <b>1.23</b>   | <b>1.17;1.29</b> | <b>&lt;.0001</b> | <b>1.11</b>  | <b>1.05;1.17</b> | <b>0.0003</b>    |
| Fatigue reduction by 1 point               | 1.00          | 0.97;1.04        | 0.7899           | 1.03         | 0.99;1.06        | 0.1255           |
| Sleeping disorder reduction by 1 point     | 1.01          | 0.98;1.05        | 0.3736           | 1.03         | 1.00;1.06        | 0.0824           |
| Glucocorticoids 5- <10mg/d, ref. <5mg      | <b>0.80</b>   | <b>0.70;0.92</b> | <b>0.0014</b>    | <b>0.84</b>  | <b>0.72;0.98</b> | <b>0.0292</b>    |
| Glucocorticoids 10- <15mg/d, ref. <5mg     | <b>0.43</b>   | <b>0.32;0.59</b> | <b>&lt;.0001</b> | <b>0.47</b>  | <b>0.35;0.64</b> | <b>&lt;.0001</b> |
| Glucocorticoids ≥ 15 mg/d, ref. <5mg       | <b>0.23</b>   | <b>0.16;0.34</b> | <b>&lt;.0001</b> | <b>0.45</b>  | <b>0.29;0.69</b> | <b>0.0003</b>    |
| ≥1 change of therapy after enrolment       | <b>0.63</b>   | <b>0.54;0.72</b> | <b>&lt;.0001</b> | <b>0.64</b>  | <b>0.55;0.75</b> | <b>&lt;.0001</b> |
| b/tsDMARD therapy                          | 1.17          | 1.00;1.37        | 0.0554           | <b>1.19</b>  | <b>1.01;1.40</b> | <b>0.0380</b>    |
